# Supplementary material for: Simple simultaneous determination of moxifloxacin and metronidazole in complex biological matrices
Source: Royal Society of Chemistry journal article supplement (doi:10.1039/d2ra01631a), 2022-01-01
Supplement: d2ra01631a1.pdf [file d2ra01631a1.pdf]

## Supplementary Figures

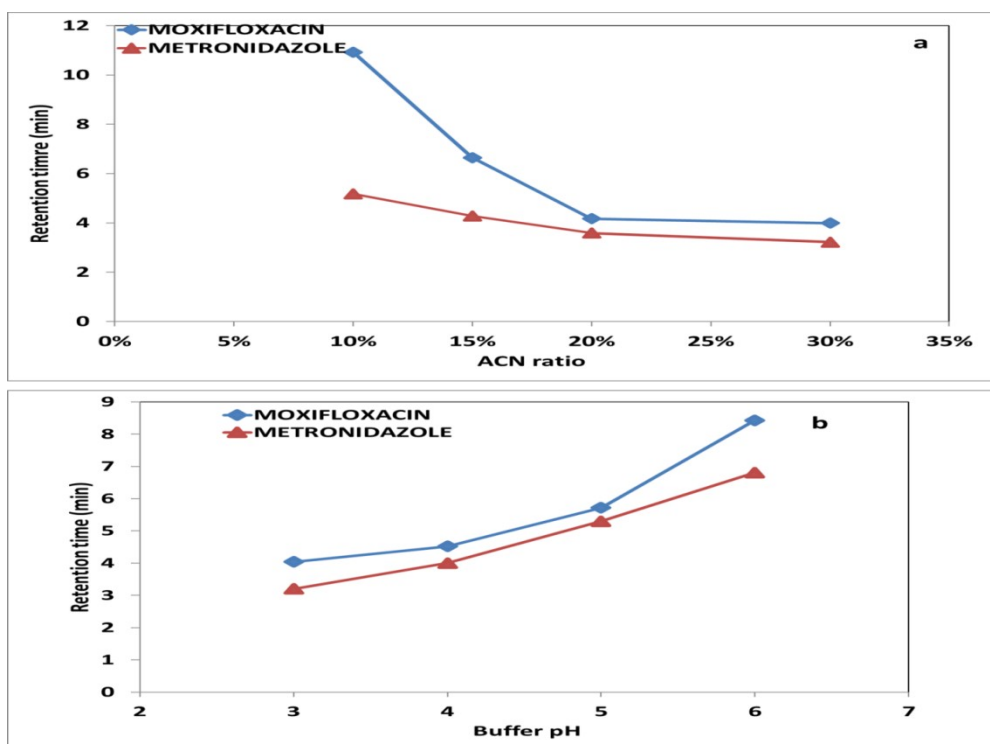

Figure S 1 (Supplementary information): Studying the effect of %ACN (a) and buffer pH (b) on the separation of MX and MT using the proposed RP-HPLC method.

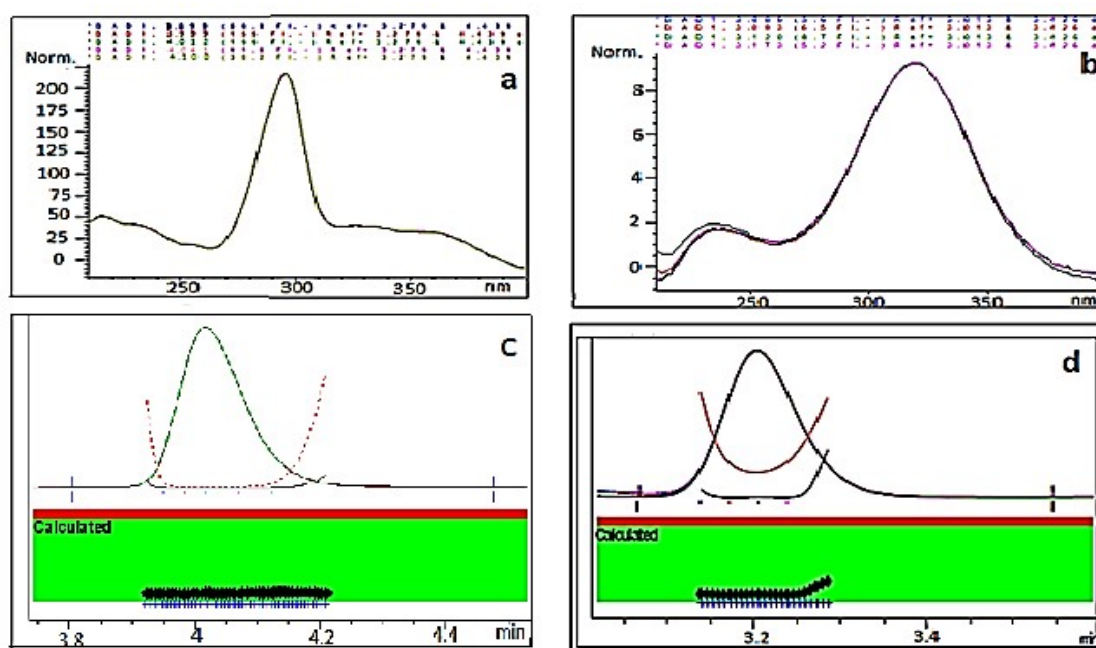

Figure S2 (Supplementary information): Absorption spectra of MX (a) and MT (b) and its peak purity plots (c) and (d) respectively.

## Supplementary Tables

**Table S1 (Supplementary information): System suitability parameters for simultaneous determination of MX and MT using the proposed RP-HPLC method.**

| Parameter                       | MX (DAD) | MX (FLD)    | MT          |
|---------------------------------|----------|-------------|-------------|
| $t_R \pm SD$ (min) <sup>a</sup> |          | 3.99 ± 0.03 | 3.22 ± 0.02 |
| Capacity factor (k')            |          | 2.99        | 2.22        |
| Selectivity ( $\alpha$ )        |          | 1.41        | 1.14        |
| Resolution ( $R_s$ )            |          | 5.43        | 3.19        |
| Theoretical plates (N)          | 4799     | 3612        | 10264       |
| Tailing factor (T)              | 1.92     | 1.79        | 1.40        |

- 
- <sup>a</sup> Average of five determinations.
  - System suitability recommendations:  $k' > 2$ ,  $R_s > 2$ ,  $N > 2000$ , and  $T \leq 2$ .

**Table S2 (Supplementary information): Regression and statistical parameters for simultaneous determination of MX and MT in biological fluids using the proposed RP-HPLC method.**

| Parameter                 | Saliva                |                       |                        | Human plasma          |                       |                       | Rat plasma            |                       |                        |
|---------------------------|-----------------------|-----------------------|------------------------|-----------------------|-----------------------|-----------------------|-----------------------|-----------------------|------------------------|
|                           | MX (DAD)              | MX (FLD)              | MT                     | MX (DAD)              | MX (FLD)              | MT                    | MX (DAD)              | MX (FLD)              | MT                     |
| Linearity range           | 1-20                  | 0.2-20                | 0.5-20                 | 1-20                  | 0.2-20                | 0.5-10                | 2-20                  | 2-10                  | 1-20                   |
| LLOQ ( $\mu\text{g/mL}$ ) | 1.0                   | 0.2                   | 0.5                    | 1.0                   | 0.2                   | 0.5                   | 2.0                   | 2.0                   | 1.0                    |
| Intercept (a)             | $7.36 \times 10^{-2}$ | $1.90 \times 10^{-2}$ | $-3.16 \times 10^{-2}$ | $9.72 \times 10^{-3}$ | $3.05 \times 10^{-3}$ | $6.13 \times 10^{-2}$ | $6.45 \times 10^{-2}$ | $1.03 \times 10^{-4}$ | $-5.40 \times 10^{-1}$ |
| Slope (b)                 | $1.80 \times 10^{-1}$ | $4.23 \times 10^{-2}$ | 2.08                   | $5.28 \times 10^{-2}$ | $1.15 \times 10^{-2}$ | $3.90 \times 10^{-1}$ | $3.74 \times 10^{-2}$ | $3.38 \times 10^{-3}$ | $6.77 \times 10^{-1}$  |
| Correlation               | 0.9992                | 0.9992                | 0.9998                 | 0.9991                | 0.9991                | 0.9995                | 0.9992                | 0.9994                | 0.9991                 |
| $S_a$                     | $2.99 \times 10^{-2}$ | $4.68 \times 10^{-3}$ | $1.54 \times 10^{-1}$  | $9.62 \times 10^{-3}$ | $7.27 \times 10^{-3}$ | $3.16 \times 10^{-4}$ | $7.27 \times 10^{-3}$ | $3.16 \times 10^{-4}$ | $1.21 \times 10^{-1}$  |
| $S_b$                     | $2.90 \times 10^{-3}$ | $5.38 \times 10^{-4}$ | $1.64 \times 10^{-2}$  | $9.35 \times 10^{-4}$ | $5.95 \times 10^{-4}$ | $4.76 \times 10^{-5}$ | $5.95 \times 10^{-4}$ | $4.76 \times 10^{-5}$ | $1.19 \times 10^{-2}$  |
| $S_b^2$                   | $8.42 \times 10^{-6}$ | $2.89 \times 10^{-7}$ | $2.68 \times 10^{-4}$  | $8.74 \times 10^{-7}$ | $3.54 \times 10^{-7}$ | $2.26 \times 10^{-9}$ | $3.54 \times 10^{-7}$ | $2.26 \times 10^{-9}$ | $1.41 \times 10^{-4}$  |
| $S_{y/x}$                 | $4.51 \times 10^{-2}$ | $9.57 \times 10^{-3}$ | $2.76 \times 10^{-1}$  | $1.45 \times 10^{-2}$ | $8.92 \times 10^{-3}$ | $3.01 \times 10^{-4}$ | $8.92 \times 10^{-3}$ | $3.01 \times 10^{-4}$ | $1.87 \times 10^{-1}$  |
| F                         | 3832.97               | 6174.51               | 16132.39               | 3188.84               | 3956.34               | 5062.04               | 3956.34               | 5062.04               | 3260.52                |
| Significance F            | $9.28 \times 10^{-6}$ | $6.32 \times 10^{-9}$ | $2.30 \times 10^{-8}$  | $1.22 \times 10^{-5}$ | $8.85 \times 10^{-6}$ | $6.12 \times 10^{-6}$ | $8.85 \times 10^{-6}$ | $6.12 \times 10^{-6}$ | $1.18 \times 10^{-5}$  |

**Table S3 (Supplementary information): Intra-day and inter-day precision and accuracy for simultaneous determination of MX and MT in standard solutions using the proposed RP-HPLC method.**

| Conc.<br>( $\mu\text{g/mL}$ ) | Average % recovery $\pm$ SD |                   |                   | %RSD     |          |      | %E <sub>r</sub> |          |       |
|-------------------------------|-----------------------------|-------------------|-------------------|----------|----------|------|-----------------|----------|-------|
|                               | MX (DAD)                    | MX (FLD)          | MT                | MX (DAD) | MX (FLD) | MT   | MX (DAD)        | MX (FLD) | MT    |
| <b>Intra-day precision</b>    |                             |                   |                   |          |          |      |                 |          |       |
| 0.2:20                        | 99.15 $\pm$ 0.16            | 100.07 $\pm$ 1.71 | 101.52 $\pm$ 0.30 | 0.16     | 1.70     | 0.29 | -0.85           | 0.07     | 1.52  |
| 40:0.2                        | 99.48 $\pm$ 1.40            | 101.21 $\pm$ 0.97 | 100.26 $\pm$ 0.67 | 1.41     | 0.96     | 0.67 | -0.52           | 1.21     | 0.26  |
| 60:80                         | 98.45 $\pm$ 0.48            | 99.70 $\pm$ 1.20  | 99.73 $\pm$ 0.46  | 0.49     | 1.20     | 0.46 | -1.55           | -0.30    | -0.27 |
| 100:40                        | 99.61 $\pm$ 0.19            | 99.72 $\pm$ 0.06  | 99.94 $\pm$ 0.43  | 0.19     | 0.06     | 0.43 | -0.39           | -0.28    | -0.06 |
| <b>Inter-day precision</b>    |                             |                   |                   |          |          |      |                 |          |       |
| 0.2:20                        | 100.76 $\pm$ 1.32           | 100.96 $\pm$ 0.55 | 101.18 $\pm$ 0.69 | 1.31     | 0.54     | 0.68 | 0.76            | 0.96     | 1.18  |
| 40:0.2                        | 100.79 $\pm$ 0.80           | 100.82 $\pm$ 1.29 | 100.70 $\pm$ 1.55 | 0.80     | 1.28     | 1.54 | 0.79            | 0.82     | 0.70  |
| 60:80                         | 98.83 $\pm$ 0.26            | 100.05 $\pm$ 0.34 | 100.71 $\pm$ 0.42 | 0.27     | 0.34     | 0.41 | -1.17           | 0.05     | 0.71  |
| 100:40                        | 99.99 $\pm$ 0.06            | 101.12 $\pm$ 0.91 | 100.68 $\pm$ 1.06 | 0.06     | 0.90     | 1.05 | -0.01           | 1.12     | 0.68  |

**Table S4 (Supplementary information): Robustness evaluation for the simultaneous determination of MX and MT using the proposed RP-HPLC method.**

| Parameter                            | Average %recovery $\pm$ %RSD |                   |                   |
|--------------------------------------|------------------------------|-------------------|-------------------|
|                                      | MX (DAD)                     | MX (FLD)          | MT                |
| Buffer pH (3 $\pm$ 0.1)              | 100.57 $\pm$ 0.35            | 98.33 $\pm$ 0.65  | 99.35 $\pm$ 0.69  |
| Buffer concentration (5mM $\pm$ 0.1) | 101.13 $\pm$ 1.22            | 100.97 $\pm$ 0.98 | 100.77 $\pm$ 1.05 |
| Detection wavelength $\pm$ 2nm       | 99.21 $\pm$ 0.47             | 99.61 $\pm$ 0.66  | 101.11 $\pm$ 0.42 |
| Flow rate (1 mL/min $\pm$ 0.1)       | 100.12 $\pm$ 1.67            | 101.28 $\pm$ 1.11 | 98.47 $\pm$ 0.85  |

**Table S5 (Supplementary information): Stability studies for MX and MT spiked in human saliva using the proposed RP-HPLC method.**

| Stability        | Storage conditions             | Conc.            | Average %recovery $\pm$ % RSD <sup>a</sup> |                    |                    |
|------------------|--------------------------------|------------------|--------------------------------------------|--------------------|--------------------|
|                  |                                |                  | MX (DAD)                                   | MX (FLD)           | MT                 |
| Freeze and thaw  | After 3 cycles at -20°C for 1h | LQC <sup>b</sup> | 110.05 $\pm$ 2.59                          | 97.65 $\pm$ 10.25  | 95.37 $\pm$ 7.23   |
|                  |                                | HQC <sup>c</sup> | 107.34 $\pm$ 3.17                          | 89.12 $\pm$ 3.78   | 110.01 $\pm$ 5.06  |
| Short term       | At 25°C for 8 h                | LQC <sup>b</sup> | 112.11 $\pm$ 1.97                          | 113.23 $\pm$ 8.66  | 87.90 $\pm$ 5.99   |
|                  |                                | HQC <sup>c</sup> | 90.15 $\pm$ 4.31                           | 96.98 $\pm$ 2.47   | 114.67 $\pm$ 3.31  |
| Post-preparative | at 4°C for 24 h                | LQC <sup>b</sup> | 88.75 $\pm$ 3.70                           | 109.78 $\pm$ 11.31 | 108.67 $\pm$ 5.40  |
|                  |                                | HQC <sup>c</sup> | 94.09 $\pm$ 7.99                           | 96.77 $\pm$ 12.53  | 106.55 $\pm$ 3.25  |
| Long term        | at-20°C for 10 days            | LQC <sup>b</sup> | 113.28 $\pm$ 4.77                          | 94.47 $\pm$ 7.25   | 114.67 $\pm$ 10.16 |
|                  |                                | HQC <sup>c</sup> | 87.66 $\pm$ 10.23                          | 104.29 $\pm$ 5.13  | 92.17 $\pm$ 8.01   |

<sup>a</sup> Percentage of recoveries average  $\pm$  relative standard determination of three replicates (n=3).

<sup>b</sup> LQC is 2  $\mu$ g/mL for MX and MT.

<sup>c</sup> HQC is 20  $\mu$ g/mL for MX and MT.

**Table S6 (Supplementary information): Stability studies for MX and MT in spiked human and rat plasma using the proposed RP-HPLC method.**

| Stability        | Storage conditions       | Conc. | Average %recovery ± %RSD <sup>a</sup> |              |              |              |              |               |
|------------------|--------------------------|-------|---------------------------------------|--------------|--------------|--------------|--------------|---------------|
|                  |                          |       | Human plasma                          |              |              | Rat plasma   |              |               |
|                  |                          |       | MX (DAD)                              | MX (FLD)     | MT (DAD)     | MX (DAD)     | MX (FLD)     | MT            |
| Freeze and thaw  | 3 cycles at -20°C for 1h | LQC   | 110.05±2.59                           | 97.65±10.25  | 95.37± 7.23  | 105.12± 6.78 | 103.22± 8.87 | 92.12± 6.65   |
|                  |                          | HQC   | 107.34±3.17                           | 89.12± 3.78  | 110.01± 5.06 | 91.17± 5.47  | 94.37± 5.09  | 89.12± 5.06   |
| Short term       | At 25°C for 8 h          | LQC   | 112.11±1.97                           | 113.23± 8.66 | 87.90± 5.99  | 111.78± 3.45 | 114.38± 6.13 | 104.12± 2.16  |
|                  |                          | HQC   | 90.15± 4.31                           | 96.98± 2.47  | 114.67± 3.31 | 87.91± 6.12  | 109.12± 9.18 | 93.67 ± 4.22  |
| Post-preparative | at 4°C for 24 h          | LQC   | 88.75±3.70                            | 109.78± 9.31 | 108.67± 5.40 | 107.45± 4.47 | 87.99± 11.30 | 104.67± 9.45  |
|                  |                          | HQC   | 94.09±7.99                            | 96.77±12.53  | 106.55± 3.25 | 114.33± 8.39 | 90.90±10.53  | 93.77± 12.40  |
| Long term        | at-20°C for 10 days      | LQC   | 113.28±4.77                           | 94.47± 7.25  | 114.67± 9.16 | 86.65± 9.49  | 91.67± 12.25 | 110.45 ± 7.05 |
|                  |                          | HQC   | 87.66±10.23                           | 104.29±5.13  | 92.17± 8.01  | 113.10± 5.23 | 109.47±11.62 | 109.97± 8.04  |

<sup>a</sup> Percentage of recoveries average ± relative standard determination of three replicates (n=3).

\* In human plasma - LQC is 2 µg/mL for MX at DAD and FLD but LQC is 1 µg/mL for MT.

- HQC is 20 µg/mL for MX at DAD and FLD and 10 µg/mL for MT.

\* In rat plasma - LQC is 4 µg/mL for MX at DAD and FLD but LQC is 2 µg/mL for MT.

-HQC is 20 µg/mL for MX and MT but it is 10 µg/mL for MX at FLD.
